# Supplementary material for: Cost of Nine Pediatric Infectious Illnesses in Low- and Middle-Income Countries: A Systematic Review of Cost-of-Illness Studies
Source: PubMed Central journal article supplement (PMC7578143; doi:10.1007/s40273-020-00940-4), 2020-08-04
Supplement: 40273_2020_940_MOESM2_ESM.pdf [file 40273_2020_940_MOESM2_ESM.pdf]

## Appendix II

**TABLE II.1: Average share of costs for households using public healthcare facilities and that reported all 3 types of costs by type of costs (unweighted).**

|                                             | Average proportion of costs |                          |                | Number of sets of costs |
|---------------------------------------------|-----------------------------|--------------------------|----------------|-------------------------|
|                                             | Direct medical costs        | Direct non-medical costs | Indirect costs |                         |
| <b>PNEUMONIA</b>                            | <b>22%</b>                  | <b>64%</b>               | <b>14%</b>     | <b>7</b>                |
| <b>Urban</b>                                | <b>24%</b>                  | <b>62%</b>               | <b>15%</b>     | <b>6</b>                |
| Inpatient care                              | 21%                         | 66%                      | 13%            | 4                       |
| Outpatient care                             | 1%                          | 86%                      | 13%            | 1                       |
| Not distinguished<br>(inpatient/outpatient) | 58%                         | 19%                      | 22%            | 1                       |
| <b>Mixed urban/rural</b>                    | <b>14%</b>                  | <b>76%</b>               | <b>10%</b>     | <b>1</b>                |
| Outpatient care                             | 14%                         | 76%                      | 10%            | 1                       |
| <b>GASTROENTERITIS</b>                      | <b>31%</b>                  | <b>16%</b>               | <b>53%</b>     | <b>19</b>               |
| <b>Rural</b>                                | <b>12%</b>                  | <b>15%</b>               | <b>72%</b>     | <b>4</b>                |
| Inpatient care                              | 12%                         | 15%                      | 72%            | 4                       |
| <b>Urban</b>                                | <b>40%</b>                  | <b>17%</b>               | <b>43%</b>     | <b>12</b>               |
| Inpatient care                              | 44%                         | 14%                      | 41%            | 9                       |
| Not distinguished<br>(inpatient/outpatient) | 28%                         | 25%                      | 47%            | 3                       |
| <b>Mixed urban/rural</b>                    | <b>21%</b>                  | <b>11%</b>               | <b>68%</b>     | <b>3</b>                |
| Inpatient care                              | 32%                         | 16%                      | 52%            | 2                       |
| Outpatient care                             | 0%                          | 0%                       | 100%           | 1                       |
| <b>MENINGITIS</b>                           | <b>36%</b>                  | <b>34%</b>               | <b>30%</b>     | <b>1</b>                |
| <b>Urban</b>                                | <b>36%</b>                  | <b>34%</b>               | <b>30%</b>     | <b>1</b>                |
| Not distinguished<br>(inpatient/outpatient) | 36%                         | 34%                      | 30%            | 1                       |
| <b>Overall</b>                              | <b>29%</b>                  | <b>29%</b>               | <b>42%</b>     | <b>27</b>               |
| Inpatient care                              | 31%                         | 26%                      | 43%            | 19                      |
| Outpatient care                             | 5%                          | 54%                      | 41%            | 3                       |
| Not distinguished<br>(inpatient/outpatient) | 36%                         | 26%                      | 39%            | 5                       |

**TABLE II.2: Average share of costs for households using private healthcare facilities and that reported all 3 types of costs by type of costs (unweighted).**

|                                             | Average proportion of costs |                          |                | Number of sets |
|---------------------------------------------|-----------------------------|--------------------------|----------------|----------------|
|                                             | Direct medical costs        | Direct non-medical costs | Indirect costs |                |
| <b>PNEUMONIA</b>                            | <b>74%</b>                  | <b>18%</b>               | <b>8%</b>      | <b>2</b>       |
| <b>Urban</b>                                | 74%                         | 18%                      | 8%             | 2              |
| Inpatient care                              | 74%                         | 18%                      | 8%             | 2              |
| <b>GASTROENTERITIS</b>                      | <b>61%</b>                  | <b>11%</b>               | <b>29%</b>     | <b>1</b>       |
| <b>Urban</b>                                | <b>61%</b>                  | <b>11%</b>               | <b>29%</b>     | <b>1</b>       |
| Not distinguished<br>(inpatient/outpatient) | 61%                         | 11%                      | 29%            | 1              |
| <b>Overall</b>                              | <b>69%</b>                  | <b>16%</b>               | <b>15%</b>     | <b>3</b>       |
| Inpatient care                              | 74%                         | 18%                      | 8%             | 2              |
| Not distinguished<br>(inpatient/outpatient) | 61%                         | 11%                      | 29%            | 1              |
