# Supplementary material for: Cost of Nine Pediatric Infectious Illnesses in Low- and Middle-Income Countries: A Systematic Review of Cost-of-Illness Studies
Source: PubMed Central journal article supplement (PMC7578143; doi:10.1007/s40273-020-00940-4), 2020-08-04
Supplement: 40273_2020_940_MOESM4_ESM.pdf [file 40273_2020_940_MOESM4_ESM.pdf]

## Appendix IV

**TABLE IV.1: Reported costs by perspective**

| Perspective                                   | Direct costs                                                                              |                                                                                                                   | Indirect costs                                                               |
|-----------------------------------------------|-------------------------------------------------------------------------------------------|-------------------------------------------------------------------------------------------------------------------|------------------------------------------------------------------------------|
|                                               | Medical                                                                                   | Non-medical                                                                                                       |                                                                              |
| <b>Household</b>                              | Consultation or registration fees                                                         | Cost of transportation to and from the healthcare facilities for the patient and the caregiver                    | Productivity loss for the caregiver related to the acute episode of illness  |
|                                               | Cost of investigations/diagnosis (radiology, laboratory tests)                            |                                                                                                                   | Productivity loss for the caregiver related to disability due to the illness |
|                                               | Cost of hospitalization/bed for the patient                                               | Cost of transportation for additional visitors to the patient during hospitalization                              |                                                                              |
|                                               | Cost of medications                                                                       |                                                                                                                   |                                                                              |
|                                               | Cost of medical supplies (oxygen tanks, nebulizer)                                        | Cost of meals for the patient and the caregiver during hospitalization                                            |                                                                              |
|                                               | Cost of traditional healing and non-institutionalized healthcare                          | Cost of lodging for the caregiver while the patient is hospitalized                                               |                                                                              |
|                                               | Other medical costs <sup>a</sup>                                                          | Cost of childcare for the household while the caregiver is away to the healthcare facility caring for the patient |                                                                              |
|                                               |                                                                                           | Cost of household supplies (diapers, soap)                                                                        |                                                                              |
|                                               |                                                                                           | Miscellaneous costs (telephone calls, gifts from visitors)                                                        |                                                                              |
|                                               |                                                                                           | <b>Service costs</b>                                                                                              |                                                                              |
| <b>Government &amp; healthcare facilities</b> | Cost of investigations/diagnosis (radiology, laboratory tests)                            |                                                                                                                   |                                                                              |
|                                               | Cost of hospitalization/bed                                                               |                                                                                                                   |                                                                              |
|                                               | Cost of medications                                                                       |                                                                                                                   |                                                                              |
|                                               | Cost of personnel (full-time, part-time and on-call staff)                                |                                                                                                                   |                                                                              |
|                                               | Cost of medical supplies                                                                  |                                                                                                                   |                                                                              |
|                                               | Cost of overhead (building maintenance, utilities)                                        |                                                                                                                   |                                                                              |
|                                               | Capital costs (infrastructure, furniture, vehicles, laboratory and radiology instruments) |                                                                                                                   |                                                                              |
| <b>Health insurance</b>                       | Amount paid by health insurance                                                           |                                                                                                                   |                                                                              |

Notes: <sup>a</sup> As reported in the articles.
